# Supplementary material for: Simultaneous enhancement of near infrared luminescence and stability of Cs2AgInCl6:Cr3+ double perovskite single crystals enabled by a Yb3+ dopant
Source: Royal Society of Chemistry journal article supplement (doi:10.1039/d2qi01104b), 2022-01-01
Supplement: d2qi01104b1.pdf [file d2qi01104b1.pdf]

**Supporting Information for:**

**Simultaneous Enhancement of Near Infrared Luminescence and  
Stability of Cs<sub>2</sub>AgInCl<sub>6</sub>:Cr<sup>3+</sup> Double Perovskites Single Crystal  
Enabled by Yb<sup>3+</sup> Dopant**

*Daiwen Chen<sup>a</sup>, Xinguo Zhang<sup>b</sup>, Jianwu Wei, Liya Zhou<sup>a</sup>, Peican Chen<sup>a</sup>, Qi Pang<sup>a\*</sup>  
and Jin Zhong Zhang<sup>c\*</sup>*

*<sup>a</sup> School of Chemistry and Chemical Engineering, University Guangxi /Key  
Laboratory of Electrochemical Energy Materials, Guangxi University, Nanning  
530004, Guangxi, Peoples R China*

*<sup>b</sup> Southern Med Univ, Sch Pharmaceut Sci, Guangzhou 510515, Peoples R China*

*<sup>c</sup> Department of Chemistry and Biochemistry, University of California, Santa Cruz,  
California 95064, United States*

*Corresponding authors: [pqigx@163.com](mailto:pqigx@163.com); [zhang@ucsc.edu](mailto:zhang@ucsc.edu)*

## **Experimental**

### **1. Materials**

The following chemicals were used as purchased without further purification: CsCl (99%, Aladdin), AgCl (99.5, Macklin), InCl<sub>3</sub> (99.99%, Aladdin), CrCl<sub>3</sub> • 6H<sub>2</sub>O (analytical pure, Aladdin), YbCl<sub>3</sub> • 6H<sub>2</sub>O (analytical pure, Aladdin), ErCl<sub>3</sub> • 6H<sub>2</sub>O (analytical pure, Aladdin), HoCl<sub>3</sub> • 6H<sub>2</sub>O (analytical pure, Aladdin), hydrochloric acid (HCl, analytical pure, Chengdu Kelong Chemical Reagent Factory, China).

### **2. Synthesis of CAIC DPSCs**

To grow pristine CAIC crystals, solid CsCl (0.337 mg, 2.00 mmol), InCl<sub>3</sub> (0.221 mg, 1.00 mmol) and AgCl (0.143 mg, 1.00 mmol) were dissolved in 15 ml of 10 M HCl and then transfer into a 50 cm<sup>3</sup> Teflon autoclave. The solution was heated at 150 °C for 12 h and then slowly and steadily cooled to 60 °C with a speed of 3 °C per hour and kept a constant temperature of 60 °C in a Teflon-lined stainless steel autoclave. The as-prepared crystals were filtered out and washed with isopropanol and dried in a furnace 3 h at 60 °C.

### **3. Synthesis of CAIC: x%Cr<sup>3+</sup> (x=10, 20, 30, 40, and 50)**

The synthesis method used is similar to the CAIC DPSCs except for adding different amount of CrCl<sub>3</sub> • 6H<sub>2</sub>O with molar ratio of Cr/(Cr + In) as 0.1, 0.2, 0.3, 0.4, 0.5. The corresponding samples are noted as CAIC: x% Cr<sup>3+</sup> (x=10, 20, 30, 40, and 50)

### **4. Synthesis of CAIC: 30%Cr<sup>3+</sup>, y% Yb<sup>3+</sup> (y=0, 1, 2, 3)**

The synthesis method is similar to that for CAIC:Cr<sup>3+</sup> DPSCs except with different amount of YbCl<sub>3</sub> • 6H<sub>2</sub>O with the molar ration of Yb/(Yb+ Cr + In) as 0.01, 0.02, 0.03

and the amount of  $\text{CrCl}_3 \cdot 6\text{H}_2\text{O}$  was fixed as the molar ratio of  $\text{Cr}/(\text{Cr} + \text{In})$  of 0.3. The corresponding samples are noted as CAIC:30%  $\text{Cr}^{3+}$ ,  $y\%\text{Yb}^{3+}$  ( $y = 0, 1, 2, 3$ )

## 5. LED fabrication and evaluation

NIR pc-LEDs were fabricated by combining as-synthesized NIR-emitting phosphor CAIC: $\text{Cr}^{3+}$ ,  $\text{Yb}^{3+}$  with InGaN UV chips ( $\lambda_{\text{em}} = 365 \text{ nm}$ ). The phosphor was mixed with epoxy resin thoroughly in a weight ratio of 1:1, then was coated on the surface of the chip to make NIR pc-LED. The Electroluminescence (EL) and NIR output power were measured by Spectrum TEQ-EL series electroluminescence quantum efficiency measurement system of Ocean Optics.

## 6. Characterization

The powders used were all obtained by grinding in a mortar. DX-2700A measured the X-ray diffraction patterns with the  $\text{Cu K}\alpha$  radiation. X-ray photoelectron spectroscopy (XPS) was measured by Escalab250Xi X-ray photoelectron spectrometer of Thermo Fisher Scientific Company in the United States. The morphology and size of the DPSCs were characterized by Scanning Electron Microscope (SEM). The elemental composition and distribution of the materials was observed by energy-dispersive X-ray spectroscopy (EDS) coupled to SEM. UV-vis diffuse reflectance spectra of the perovskite powder were obtained at room temperature using the Techcomp UV2600 variable slit UV-vis spectrophotometer. PL, PLE, TRPL, and Temperature-dependent PL were measured by FLS1000 fluorescence spectrometer of Edinburgh instruments. PL and PLE were measured with the xenon lamp (Xe900) as excitation source, TRPL spectrum was recorded with microsecond lamp as an

excitation source. PLQY was measured by integrating sphere and Hamamatsu quantum yield measurement system.

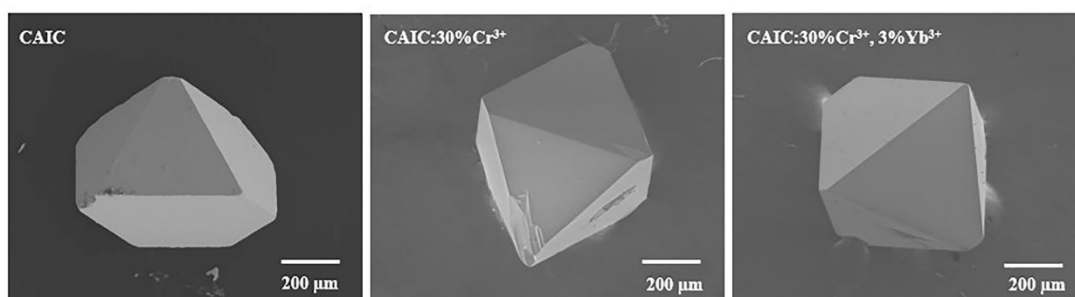

Figure S1. SEM image of CAIC:30%Cr<sup>3+</sup> and CAIC:30%Cr<sup>3+</sup>, 3%Yb<sup>3+</sup>

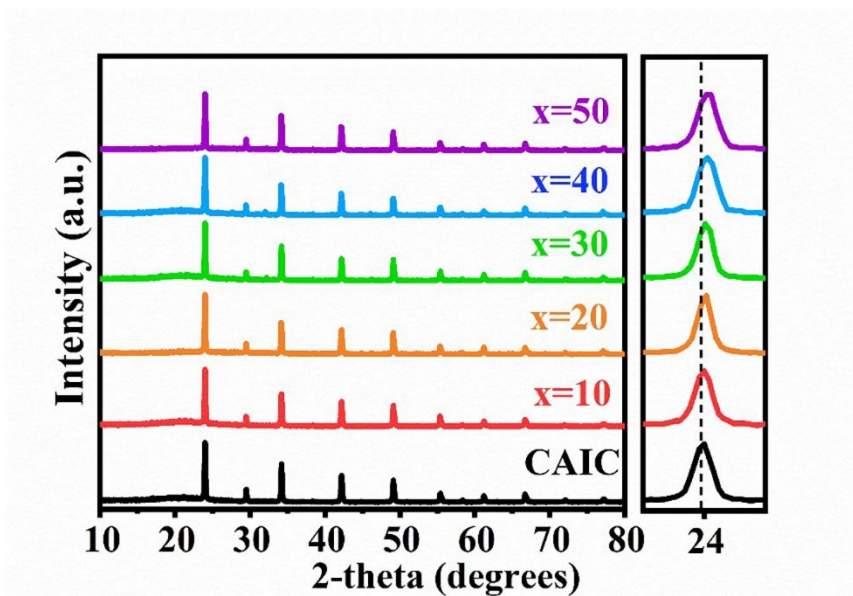

Figure S2. XRD patterns of CAIC: x%Cr<sup>3+</sup> (x = 0, 10, 20, 30, 40, 50) DPSCs.

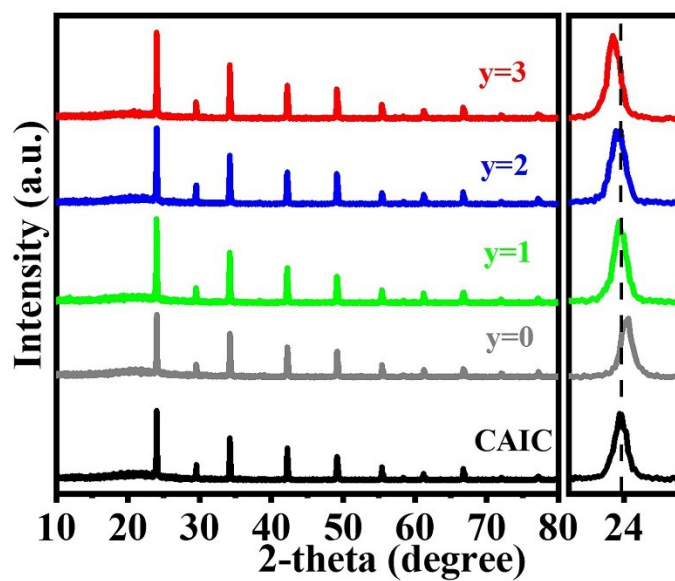

Figure S3. XRD patterns of CAIC:30%Cr,  $y\%$ Yb ( $y = 0, 1, 2, 3$ ) DPSCs.

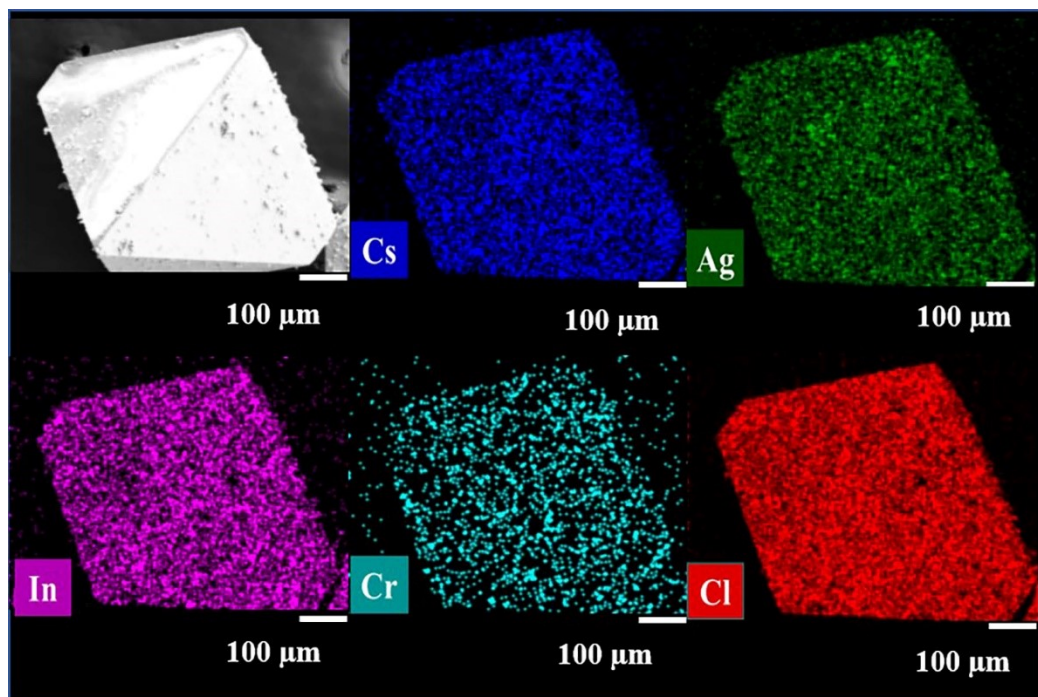

Figure S4. SEM image and EDS spectra of CAIC:30%Cr with the corresponding atomic maps.

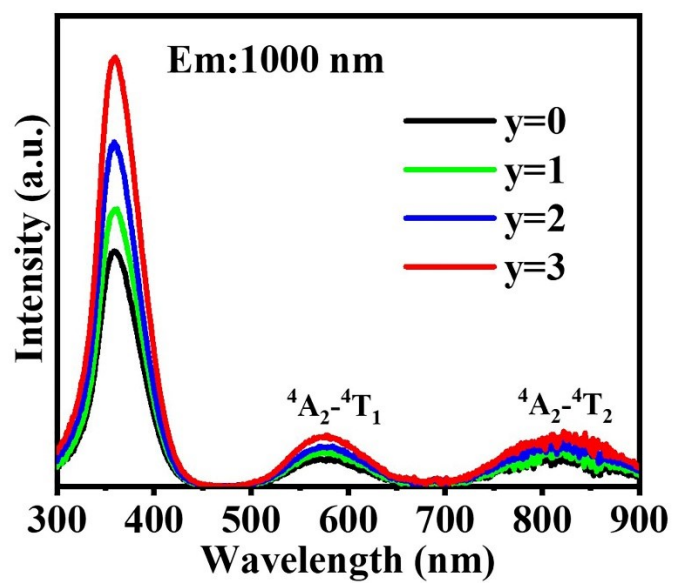

Figure S5. PLE spectra of CAIC:30%Cr<sup>3+</sup>,y%Yb<sup>3+</sup> (y=0, 1, 2, 3).

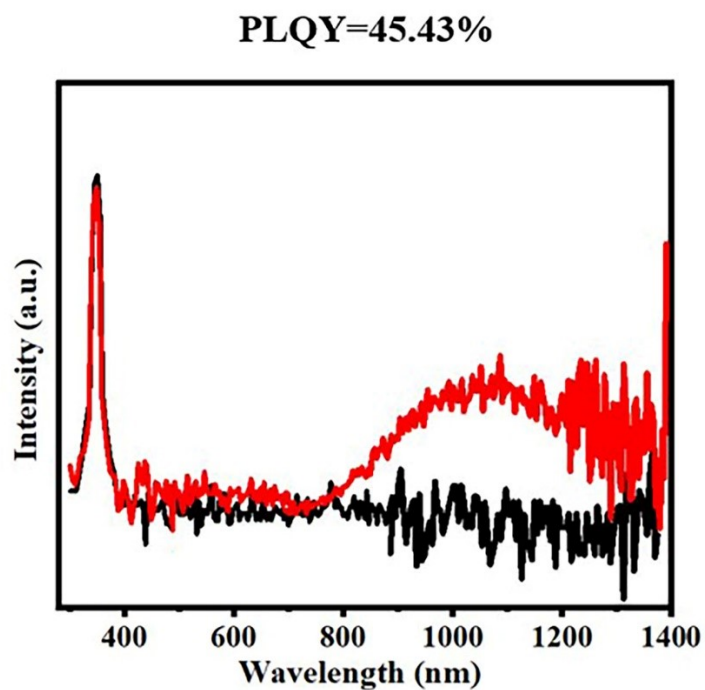

Figure S6. Absolute photoluminescence quantum yield (PLQY) of CAIC:30%Cr<sup>3+</sup>, 3%Yb<sup>3+</sup> DPSCs.

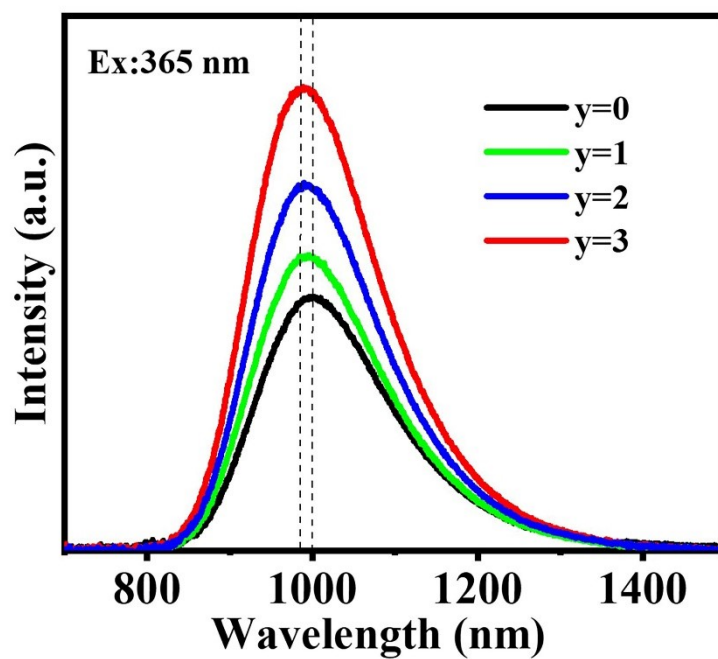

Figure S7. PL spectra of CAIC:30%Cr<sup>3+</sup>,y%Yb<sup>3+</sup> (y=0, 1, 2, 3). The incorporated samples were tested at  $\lambda_{\text{ex}}=365$  nm.

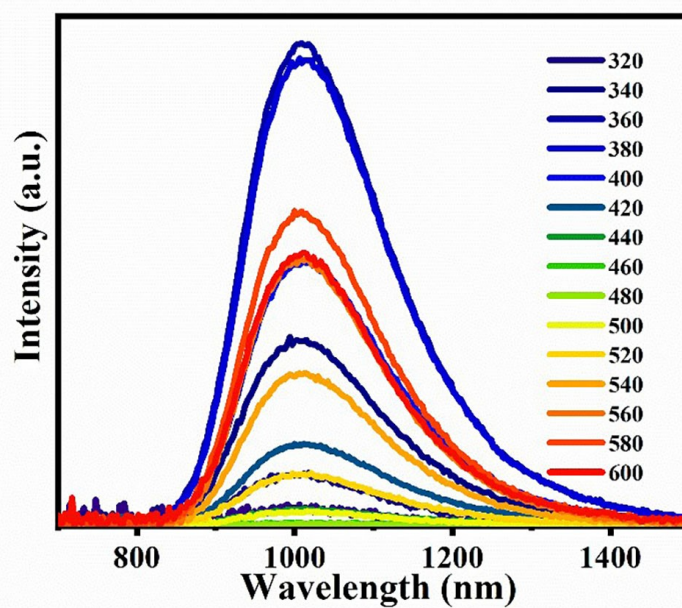

Figure S8. Excitation-wavelength-dependent (320-600 nm) PL spectra of CAIC:30%Cr<sup>3+</sup>,3%Yb<sup>3+</sup>.



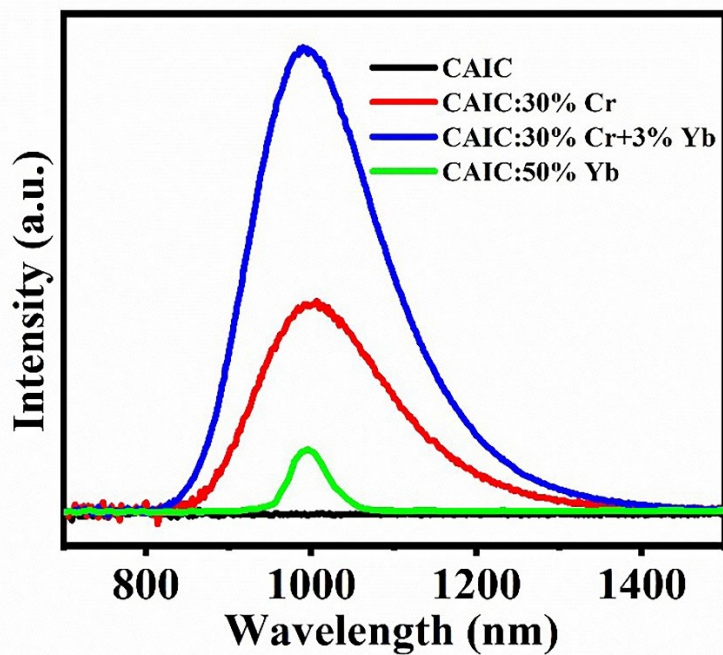

Figure S9. PL spectra of CAIC:30%Cr<sup>3+</sup>,3%Yb<sup>3+</sup> and CAIC:Yb<sup>3+</sup>. The emission spectrum of CAIC:Yb<sup>3+</sup> in the figure is magnified tenfold.

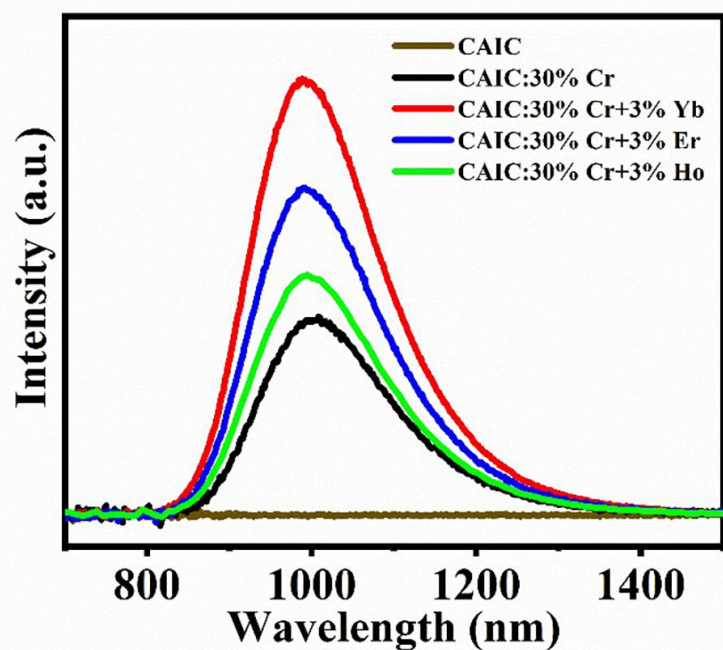

Figure S10. PL curves measured from CAIC:Cr<sup>3+</sup> and CAIC:Ln<sup>3+</sup> samples. The incorporated samples were tested at  $\lambda_{\text{ex}} = 365$  nm.



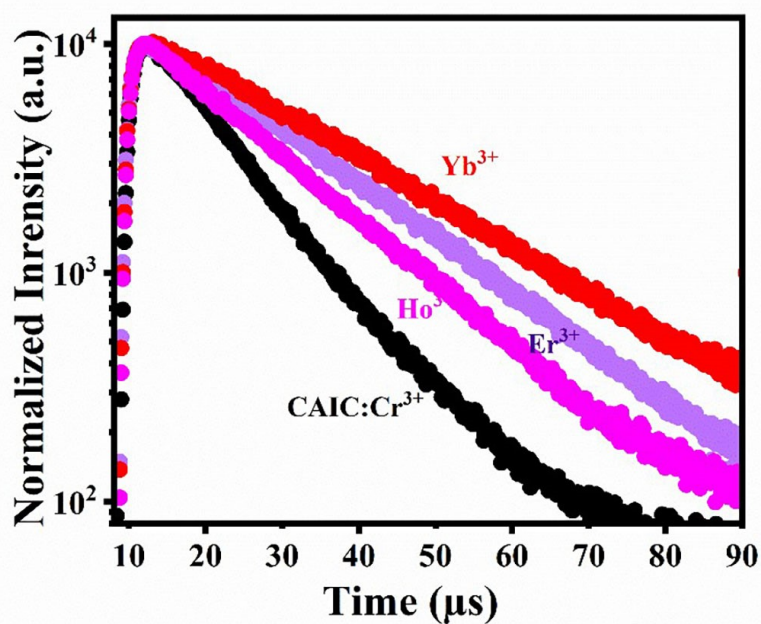

Figure S11. TRPL decay curves of CAIC:Cr<sup>3+</sup> doped with or without Ln<sup>3+</sup> ions.

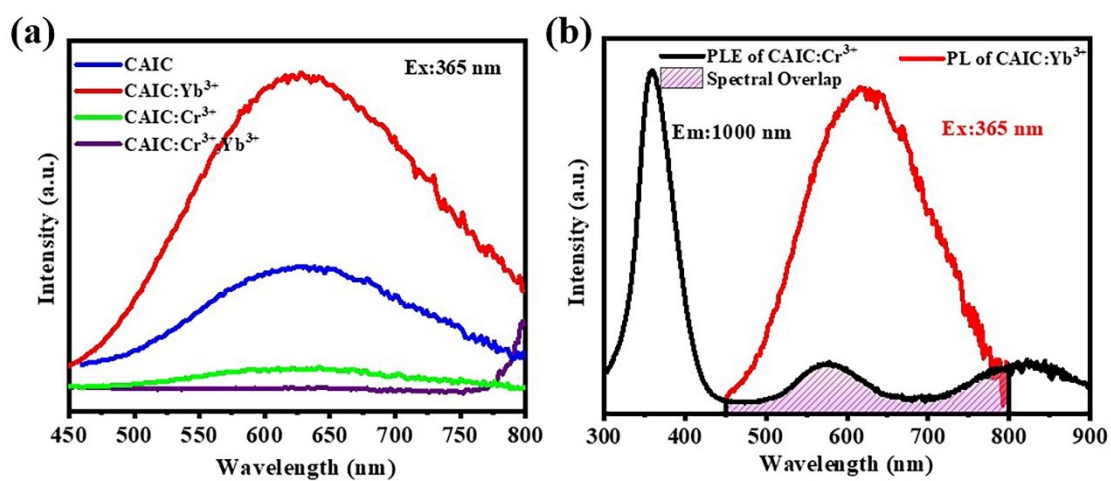

Figure S12. (a) The PL spectra of CAIC:Yb<sup>3+</sup>, CAIC:Cr<sup>3+</sup> and CAIC:Cr<sup>3+</sup>,Yb<sup>3+</sup> at 450-800nm. (b) The spectral overlapping between the PL spectrum of CAIC:Yb<sup>3+</sup> and the excitation band of CAIC:Cr<sup>3+</sup>.

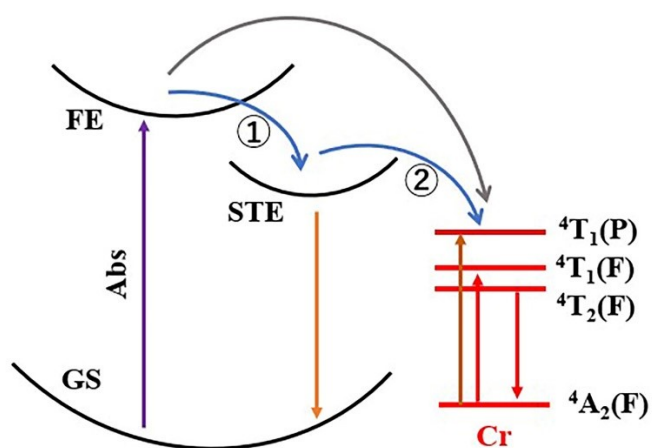

Figure S13. The photophysical process in  $\text{Cr}^{3+}$ -incorporated CAIC DPSCs.

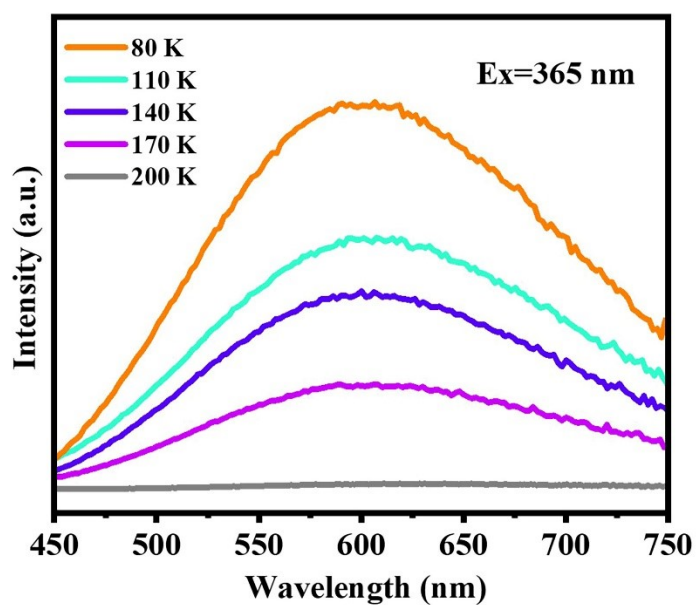

Figure S14. Temperature-dependent PL spectra at 450-750 nm at low temperature of  $\text{CAIC:Cr}^{3+}$

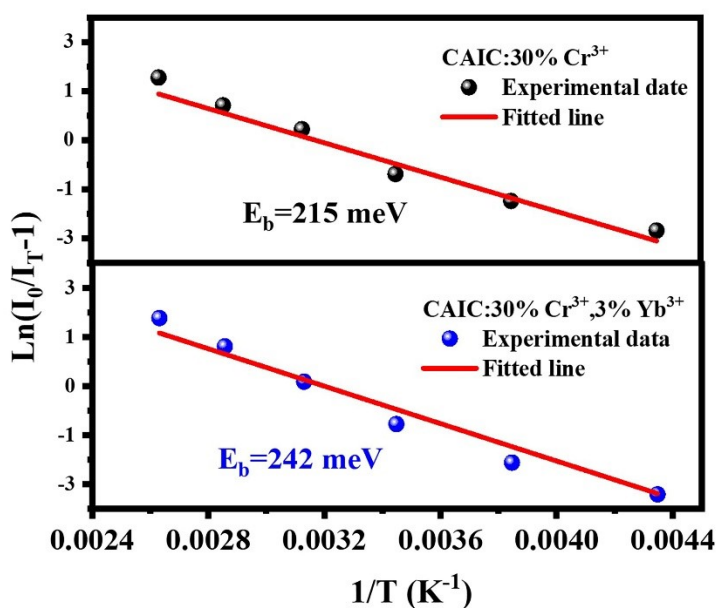

Figure S15.  $\ln(I_0/I_T - 1)$  versus  $1/T$  plot of the temperature dependent spectra.

Table S1 Details of X-ray crystallographic parameters of single crystals.

| Parameter                                      | $\text{Cs}_2\text{AgIn}_{0.7}\text{Cr}_{0.3}\text{Cl}_6$                                                                                    | $\text{Cs}_2\text{AgInCl}_6$                                                                                                                |
|------------------------------------------------|---------------------------------------------------------------------------------------------------------------------------------------------|---------------------------------------------------------------------------------------------------------------------------------------------|
| Formula weight                                 | 628.36                                                                                                                                      | 701.21                                                                                                                                      |
| Crystal system                                 | cubic                                                                                                                                       | cubic                                                                                                                                       |
| Space group                                    | Fm-3m                                                                                                                                       | Fm-3m                                                                                                                                       |
| Unit-cell dimension                            | $a/\text{\AA}=10.4523$<br>$b/\text{\AA}=10.4523$<br>$c/\text{\AA}=10.4523$<br>$\alpha/^\circ=90$<br>$\beta/^\circ=90$<br>$\gamma/^\circ=90$ | $a/\text{\AA}=10.4609$<br>$b/\text{\AA}=10.4609$<br>$c/\text{\AA}=10.4609$<br>$\alpha/^\circ=90$<br>$\beta/^\circ=90$<br>$\gamma/^\circ=90$ |
| Volume/ $\text{\AA}^3$                         | 1141.9                                                                                                                                      | 1144.7                                                                                                                                      |
| Z                                              | 4                                                                                                                                           | 2                                                                                                                                           |
| $\rho_{\text{calc}} \text{ g/cm}^3$            | 3.969                                                                                                                                       | 4.069                                                                                                                                       |
| Crystal size/ $\text{mm}^3$                    | $0.12 \times 0.1 \times 0.1$                                                                                                                | $0.2 \times 0.2 \times 0.2$                                                                                                                 |
| Radiation                                      | $\text{GaK}\alpha$ ( $\lambda = 1.34139$ )                                                                                                  | $\text{GaK}\alpha$ ( $\lambda = 1.34139$ )                                                                                                  |
| Final R indexes [ $I \geq 2\sigma(I)$ ]        | $R_1 = 0.0426$ , $wR_2 = 0.0970$                                                                                                            | $R_1 = 0.0255$ , $wR_2 = 1.178$                                                                                                             |
| Final R indexes [all data]                     | $R_1 = 0.0438$ , $wR_2 = 0.0976$                                                                                                            | $R_1 = 0.0255$ , $wR_2 = 0.0513$                                                                                                            |
| Largest diff. peak/hole / $e \text{ \AA}^{-3}$ | 1.96/-1.27                                                                                                                                  | 2.18/-0.74                                                                                                                                  |

Table S2. Details of atoms occupation situation of Cs<sub>2</sub>AgIn<sub>0.7</sub>Cr<sub>0.3</sub>Cl<sub>6</sub> single crystal.

| Atom | x         | y    | z    | U      |
|------|-----------|------|------|--------|
| Cs1  | 0.75      | 0.25 | 0.25 | 0.0396 |
| Ag1  | 0.5       | 0.5  | 0.5  | 0.0273 |
| In1  | 1         | 0.5  | 0.5  | 0.0276 |
| Cr1  | 1         | 0.5  | 0.5  | 0.0276 |
| Cl1  | 0.7402(5) | 0.5  | 0.5  | 0.0424 |

Table S3. Bond length of Cs<sub>2</sub>AgIn<sub>0.7</sub>Cr<sub>0.3</sub>Cl<sub>6</sub> single crystal.

| Atom | Atom              | Length/ Å | Atom     | Atom              | Length/ Å |
|------|-------------------|-----------|----------|-------------------|-----------|
| Cs1  | Cl1               | 3.6969(7) | Ag1      | Cl1 <sup>2</sup>  | 2.510(5)  |
| Cs1  | Cl1 <sup>1</sup>  | 3.6969(7) | Ag1      | Cl1 <sup>12</sup> | 2.510(5)  |
| Cs1  | Cl1 <sup>2</sup>  | 3.6969(7) | Ag1      | Cl1 <sup>13</sup> | 2.510(5)  |
| Cs1  | Cl1 <sup>3</sup>  | 3.6969(7) | Ag1      | Cl1 <sup>3</sup>  | 2.510(5)  |
| Cs1  | Cl1 <sup>4</sup>  | 3.6969(7) | Ag1      | Cl1 <sup>14</sup> | 2.510(5)  |
| Cs1  | Cl1 <sup>5</sup>  | 3.6969(6) | In1      | Cl1               | 2.716(5)  |
| Cs1  | Cl1 <sup>6</sup>  | 3.6969(7) | In1      | Cl1 <sup>15</sup> | 2.716(5)  |
| Cs1  | Cl1 <sup>7</sup>  | 3.6969(7) | In1      | Cl1 <sup>1</sup>  | 2.716(5)  |
| Cs1  | Cl1 <sup>8</sup>  | 3.6969(7) | In1/ Cr1 | Cl1 <sup>16</sup> | 2.716(5)  |
| Cs1  | Cl1 <sup>9</sup>  | 3.6969(7) | In1/ Cr1 | Cl1 <sup>8</sup>  | 2.716(5)  |
| Cs1  | Cl1 <sup>10</sup> | 3.6969(7) | In1/ Cr1 | Cl1 <sup>17</sup> | 2.716(5)  |
| Cs1  | Cl1 <sup>11</sup> | 3.6969(7) | In1/ Cr1 | Cl1               | 2.716(5)  |
| Ag1  | Cl1               | 2.510(5)  |          |                   |           |

Table S4. Bond Angles of Cs<sub>2</sub>AgIn<sub>0.7</sub>Cr<sub>0.3</sub>Cl<sub>6</sub> single crystal.

| Atom              | Atom | Atom             | Angle/°    | Atom              | Atom | Atom              | Angle/°    |
|-------------------|------|------------------|------------|-------------------|------|-------------------|------------|
| Cl1               | Cs1  | Cl1 <sup>1</sup> | 119.975(3) | Cl1 <sup>16</sup> | Ag1  | Cs1 <sup>12</sup> | 54.736(1)  |
| Cl1 <sup>2</sup>  | Cs1  | Cl1 <sup>3</sup> | 90.044(5)  | Cl1 <sup>16</sup> | Ag1  | Cs1 <sup>14</sup> | 125.3      |
| Cl1 <sup>4</sup>  | Cs1  | Cl1 <sup>5</sup> | 119.974(3) | Cl1 <sup>7</sup>  | Ag1  | Cl1 <sup>17</sup> | 180.0      |
| Cl1 <sup>5</sup>  | Cs1  | Cl1 <sup>3</sup> | 176.81(17) | Cl1 <sup>18</sup> | Ag1  | Cl1               | 180.0      |
| Cl1 <sup>6</sup>  | Cs1  | Cl1 <sup>7</sup> | 90.044(5)  | Cl1 <sup>16</sup> | Ag1  | Cl1 <sup>17</sup> | 90.000(1)  |
| Cl1 <sup>8</sup>  | Cs1  | Cl1 <sup>5</sup> | 62.60(13)  | Cl1 <sup>17</sup> | Ag1  | Cl1               | 90.000(1)  |
| Cl1 <sup>8</sup>  | Cs1  | Cl1 <sup>3</sup> | 119.974(3) | Cl1 <sup>10</sup> | Ag1  | Cl1 <sup>7</sup>  | 90.0       |
| Cl1               | Cs1  | Cl1 <sup>2</sup> | 176.81(17) | Cl1 <sup>16</sup> | Ag1  | Cl1 <sup>7</sup>  | 90.0       |
| Cl1 <sup>1</sup>  | Cs1  | Cl1 <sup>7</sup> | 90.044(5)  | Cl1 <sup>7</sup>  | Ag1  | Cl1 <sup>18</sup> | 90.000(1)  |
| Cl1 <sup>4</sup>  | Cs1  | Cl1 <sup>7</sup> | 119.974(3) | Cl1 <sup>10</sup> | Ag1  | Cl1 <sup>18</sup> | 90.000(1)  |
| Cl1               | Cs1  | Cl1 <sup>5</sup> | 90.044(5)  | Cl1 <sup>17</sup> | Ag1  | Cl1 <sup>18</sup> | 90.0       |
| Cl1 <sup>1</sup>  | Cs1  | Cl1 <sup>2</sup> | 57.39(14)  | Cl1 <sup>10</sup> | Ag1  | Cl1 <sup>16</sup> | 180.0      |
| Cl1 <sup>9</sup>  | Cs1  | Cl1 <sup>5</sup> | 119.974(3) | Cl1 <sup>10</sup> | Ag1  | Cl1               | 90.0       |
| Cl1 <sup>1</sup>  | Cs1  | Cl1 <sup>3</sup> | 62.60(13)  | Cl1 <sup>16</sup> | Ag1  | Cl1 <sup>18</sup> | 90.0       |
| Cl1 <sup>2</sup>  | Cs1  | Cl1 <sup>9</sup> | 62.60(13)  | Cl1 <sup>16</sup> | Ag1  | Cl1               | 90.000(1)  |
| Cl1               | Cs1  | Cl1 <sup>8</sup> | 119.975(3) | Cl1 <sup>7</sup>  | Ag1  | Cl1               | 90.0       |
| Cl1 <sup>10</sup> | Cs1  | Cl1 <sup>9</sup> | 119.974(3) | Cl1 <sup>10</sup> | Ag1  | Cl1 <sup>17</sup> | 90.0       |
| Cl1               | Cs1  | Cl1 <sup>7</sup> | 57.39(14)  | Cs1 <sup>19</sup> | In1  | Cs1 <sup>20</sup> | 70.5       |
| Cl1 <sup>8</sup>  | Cs1  | Cl1 <sup>7</sup> | 62.60(13)  | Cs1 <sup>21</sup> | In1  | Cs1 <sup>5</sup>  | 109.471(1) |
| Cl1 <sup>1</sup>  | Cs1  | Cl1 <sup>8</sup> | 57.39(14)  | Cs1 <sup>21</sup> | In1  | Cs1 <sup>19</sup> | 109.471(1) |

|                   |     |                   |            |                   |     |                   |            |
|-------------------|-----|-------------------|------------|-------------------|-----|-------------------|------------|
| Cl1 <sup>10</sup> | Cs1 | Cl1 <sup>7</sup>  | 57.39(14)  | Cs1               | In1 | Cs1 <sup>5</sup>  | 70.529(1)  |
| Cl1 <sup>9</sup>  | Cs1 | Cl1 <sup>7</sup>  | 176.81(17) | Cs1 <sup>21</sup> | In1 | Cs1 <sup>3</sup>  | 109.471(1) |
| Cl1 <sup>2</sup>  | Cs1 | Cl1 <sup>5</sup>  | 90.044(5)  | Cs1 <sup>5</sup>  | In1 | Cs1 <sup>3</sup>  | 109.471(1) |
| Cl1 <sup>2</sup>  | Cs1 | Cl1 <sup>8</sup>  | 57.39(14)  | Cs1 <sup>5</sup>  | In1 | Cs1 <sup>20</sup> | 180.0      |
| Cl1 <sup>11</sup> | Cs1 | Cl1 <sup>5</sup>  | 57.39(14)  | Cs1               | In1 | Cs1 <sup>21</sup> | 180.0      |
| Cl1 <sup>10</sup> | Cs1 | Cl1 <sup>5</sup>  | 119.974(3) | Cs1 <sup>3</sup>  | In1 | Cs1 <sup>20</sup> | 70.5       |
| Cl1               | Cs1 | Cl1 <sup>3</sup>  | 90.044(5)  | Cs1               | In1 | Cs1 <sup>3</sup>  | 70.529(1)  |
| Cl1               | Cs1 | Cl1 <sup>4</sup>  | 62.60(13)  | Cs1               | In1 | Cs1 <sup>19</sup> | 70.529(1)  |
| Cl1 <sup>1</sup>  | Cs1 | Cl1 <sup>9</sup>  | 90.044(5)  | Cs1 <sup>21</sup> | In1 | Cs1 <sup>20</sup> | 70.529(1)  |
| Cl1 <sup>11</sup> | Cs1 | Cl1 <sup>3</sup>  | 119.974(3) | Cs1               | In1 | Cs1 <sup>20</sup> | 109.5      |
| Cl1 <sup>8</sup>  | Cs1 | Cl1 <sup>9</sup>  | 119.974(3) | Cs1 <sup>19</sup> | In1 | Cs1 <sup>3</sup>  | 109.5      |
| Cl1 <sup>1</sup>  | Cs1 | Cl1 <sup>4</sup>  | 119.974(3) | Cs1 <sup>19</sup> | In1 | Cs1 <sup>5</sup>  | 109.5      |
| Cl1 <sup>1</sup>  | Cs1 | Cl1 <sup>11</sup> | 119.974(3) | Cl1 <sup>22</sup> | In1 | Cs1 <sup>19</sup> | 125.3      |
| Cl1 <sup>11</sup> | Cs1 | Cl1 <sup>9</sup>  | 62.60(13)  | Cl1 <sup>22</sup> | In1 | Cs1 <sup>3</sup>  | 54.736(1)  |
| Cl1 <sup>2</sup>  | Cs1 | Cl1 <sup>11</sup> | 62.60(13)  | Cl1 <sup>23</sup> | In1 | Cs1 <sup>20</sup> | 125.264(1) |
| Cl1 <sup>2</sup>  | Cs1 | Cl1 <sup>4</sup>  | 119.974(3) | Cl1 <sup>6</sup>  | In1 | Cs1 <sup>19</sup> | 54.7       |
| Cl1 <sup>8</sup>  | Cs1 | Cl1 <sup>11</sup> | 90.044(5)  | Cl1               | In1 | Cs1               | 54.7       |
| Cl1 <sup>2</sup>  | Cs1 | Cl1 <sup>7</sup>  | 119.974(2) | Cl1 <sup>21</sup> | In1 | Cs1 <sup>5</sup>  | 125.3      |
| Cl1 <sup>4</sup>  | Cs1 | Cl1 <sup>11</sup> | 90.044(5)  | Cl1               | In1 | Cs1 <sup>3</sup>  | 54.7       |
| Cl1 <sup>8</sup>  | Cs1 | Cl1 <sup>4</sup>  | 176.81(17) | Cl1 <sup>6</sup>  | In1 | Cs1               | 54.7       |
| Cl1 <sup>6</sup>  | Cs1 | Cl1 <sup>11</sup> | 57.39(14)  | Cl1 <sup>21</sup> | In1 | Cs1 <sup>3</sup>  | 125.3      |
| Cl1 <sup>11</sup> | Cs1 | Cl1 <sup>7</sup>  | 119.974(3) | Cl1 <sup>21</sup> | In1 | Cs1 <sup>21</sup> | 54.7       |
| Cl1               | Cs1 | Cl1 <sup>10</sup> | 57.39(14)  | Cl1 <sup>23</sup> | In1 | Cs1 <sup>19</sup> | 125.3      |
| Cl1               | Cs1 | Cl1 <sup>6</sup>  | 62.60(13)  | Cl1 <sup>21</sup> | In1 | Cs1               | 125.3      |
| Cl1 <sup>1</sup>  | Cs1 | Cl1 <sup>10</sup> | 62.60(13)  | Cl1 <sup>21</sup> | In1 | Cs1 <sup>20</sup> | 54.7       |
| Cl1 <sup>1</sup>  | Cs1 | Cl1 <sup>5</sup>  | 119.974(2) | Cl1 <sup>6</sup>  | In1 | Cs1 <sup>20</sup> | 125.3      |
| Cl1 <sup>2</sup>  | Cs1 | Cl1 <sup>10</sup> | 119.974(3) | Cl1 <sup>4</sup>  | In1 | Cs1 <sup>5</sup>  | 125.3      |
| Cl1 <sup>1</sup>  | Cs1 | Cl1 <sup>6</sup>  | 176.81(17) | Cl1               | In1 | Cs1 <sup>21</sup> | 125.3      |
| Cl1 <sup>8</sup>  | Cs1 | Cl1 <sup>10</sup> | 90.044(5)  | Cl1 <sup>22</sup> | In1 | Cs1 <sup>5</sup>  | 125.3      |
| Cl1 <sup>6</sup>  | Cs1 | Cl1 <sup>5</sup>  | 57.39(14)  | Cl1 <sup>6</sup>  | In1 | Cs1 <sup>3</sup>  | 125.3      |
| Cl1 <sup>4</sup>  | Cs1 | Cl1 <sup>10</sup> | 90.044(5)  | Cl1 <sup>6</sup>  | In1 | Cs1 <sup>5</sup>  | 54.7       |
| Cl1 <sup>2</sup>  | Cs1 | Cl1 <sup>6</sup>  | 119.974(3) | Cl1 <sup>23</sup> | In1 | Cs1 <sup>21</sup> | 54.736(1)  |
| Cl1 <sup>6</sup>  | Cs1 | Cl1 <sup>10</sup> | 119.974(3) | Cl1 <sup>4</sup>  | In1 | Cs1 <sup>21</sup> | 125.3      |
| Cl1 <sup>7</sup>  | Cs1 | Cl1 <sup>5</sup>  | 62.60(13)  | Cl1               | In1 | Cs1 <sup>19</sup> | 125.3      |
| Cl1 <sup>11</sup> | Cs1 | Cl1 <sup>10</sup> | 176.81(17) | Cl1 <sup>22</sup> | In1 | Cs1 <sup>21</sup> | 54.7       |
| Cl1 <sup>8</sup>  | Cs1 | Cl1 <sup>6</sup>  | 119.974(3) | Cl1               | In1 | Cs1 <sup>5</sup>  | 54.7       |
| Cl1 <sup>6</sup>  | Cs1 | Cl1 <sup>3</sup>  | 119.974(3) | Cl1 <sup>6</sup>  | In1 | Cs1 <sup>21</sup> | 125.3      |
| Cl1 <sup>4</sup>  | Cs1 | Cl1 <sup>3</sup>  | 57.39(14)  | Cl1 <sup>4</sup>  | In1 | Cs1 <sup>20</sup> | 54.7       |
| Cl1 <sup>10</sup> | Cs1 | Cl1 <sup>3</sup>  | 62.60(13)  | Cl1 <sup>4</sup>  | In1 | Cs1 <sup>19</sup> | 54.7       |
| Cl1 <sup>4</sup>  | Cs1 | Cl1 <sup>6</sup>  | 62.60(13)  | Cl1 <sup>23</sup> | In1 | Cs1 <sup>5</sup>  | 54.736(1)  |
| Cl1 <sup>7</sup>  | Cs1 | Cl1 <sup>3</sup>  | 119.974(3) | Cl1 <sup>23</sup> | In1 | Cs1               | 125.264(1) |
| Cl1 <sup>9</sup>  | Cs1 | Cl1 <sup>3</sup>  | 57.39(14)  | Cl1 <sup>23</sup> | In1 | Cs1 <sup>3</sup>  | 125.3      |
| Cl1 <sup>4</sup>  | Cs1 | Cl1 <sup>9</sup>  | 57.39(14)  | Cl1 <sup>4</sup>  | In1 | Cs1               | 54.7       |
| Cl1               | Cs1 | Cl1 <sup>11</sup> | 119.974(3) | Cl1 <sup>22</sup> | In1 | Cs1               | 125.3      |
| Cl1 <sup>6</sup>  | Cs1 | Cl1 <sup>9</sup>  | 90.044(5)  | Cl1 <sup>21</sup> | In1 | Cs1 <sup>19</sup> | 54.7       |
| Cl1               | Cs1 | Cl1 <sup>9</sup>  | 119.974(3) | Cl1 <sup>4</sup>  | In1 | Cs1 <sup>3</sup>  | 54.7       |
| Cs1 <sup>12</sup> | Ag1 | Cs1 <sup>13</sup> | 180.0      | Cl1               | In1 | Cs1 <sup>20</sup> | 125.3      |
| Cs1               | Ag1 | Cs1 <sup>14</sup> | 109.5      | Cl1 <sup>22</sup> | In1 | Cs1 <sup>20</sup> | 54.7       |

|                   |     |                   |            |                   |     |                   |            |
|-------------------|-----|-------------------|------------|-------------------|-----|-------------------|------------|
| Cs1               | Ag1 | Cs1 <sup>15</sup> | 109.5      | Cl1               | In1 | Cl1 <sup>22</sup> | 90.000(1)  |
| Cs1 <sup>13</sup> | Ag1 | Cs1 <sup>14</sup> | 70.529(1)  | Cl1 <sup>4</sup>  | In1 | Cl1 <sup>21</sup> | 90.0       |
| Cs1 <sup>12</sup> | Ag1 | Cs1 <sup>15</sup> | 109.471(1) | Cl1 <sup>22</sup> | In1 | Cl1 <sup>6</sup>  | 180.0      |
| Cs1 <sup>13</sup> | Ag1 | Cs1 <sup>15</sup> | 70.529(1)  | Cl1 <sup>23</sup> | In1 | Cl1 <sup>21</sup> | 90.000(1)  |
| Cs1 <sup>5</sup>  | Ag1 | Cs1 <sup>15</sup> | 70.5       | Cl1               | In1 | Cl1 <sup>23</sup> | 90.000(1)  |
| Cs1 <sup>12</sup> | Ag1 | Cs1               | 109.471(1) | Cl1               | In1 | Cl1 <sup>4</sup>  | 90.000(1)  |
| Cs1 <sup>12</sup> | Ag1 | Cs1 <sup>5</sup>  | 70.529(1)  | Cl1               | In1 | Cl1 <sup>6</sup>  | 90.000(1)  |
| Cs1 <sup>5</sup>  | Ag1 | Cs1 <sup>14</sup> | 180.0      | Cl1 <sup>23</sup> | In1 | Cl1 <sup>22</sup> | 90.000(1)  |
| Cs1 <sup>13</sup> | Ag1 | Cs1 <sup>5</sup>  | 109.5      | Cl1 <sup>23</sup> | In1 | Cl1 <sup>6</sup>  | 90.0       |
| Cs1 <sup>13</sup> | Ag1 | Cs1               | 70.529(1)  | Cl1 <sup>22</sup> | In1 | Cl1 <sup>21</sup> | 90.000(1)  |
| Cs1               | Ag1 | Cs1 <sup>5</sup>  | 70.5       | Cl1 <sup>23</sup> | In1 | Cl1 <sup>4</sup>  | 180.0      |
| Cs1 <sup>12</sup> | Ag1 | Cs1 <sup>14</sup> | 109.471(1) | Cl1 <sup>4</sup>  | In1 | Cl1 <sup>22</sup> | 90.0       |
| Cs1 <sup>14</sup> | Ag1 | Cs1 <sup>15</sup> | 109.471(1) | Cl1 <sup>6</sup>  | In1 | Cl1 <sup>21</sup> | 90.0       |
| Cl1 <sup>16</sup> | Ag1 | Cs1 <sup>5</sup>  | 54.7       | Cl1               | In1 | Cl1 <sup>21</sup> | 180.0      |
| Cl1 <sup>10</sup> | Ag1 | Cs1 <sup>14</sup> | 54.7       | Cl1 <sup>4</sup>  | In1 | Cl1 <sup>6</sup>  | 90.0       |
| Cl1 <sup>7</sup>  | Ag1 | Cs1 <sup>15</sup> | 54.7       | Cs1 <sup>12</sup> | Cl1 | Cs1               | 176.81(17) |
| Cl1 <sup>7</sup>  | Ag1 | Cs1 <sup>5</sup>  | 54.7       | Cs1               | Cl1 | Cs1 <sup>5</sup>  | 89.956(5)  |
| Cl1 <sup>17</sup> | Ag1 | Cs1 <sup>13</sup> | 125.3      | Cs1 <sup>5</sup>  | Cl1 | Cs1 <sup>3</sup>  | 176.81(17) |
| Cl1 <sup>17</sup> | Ag1 | Cs1 <sup>12</sup> | 54.7       | Cs1               | Cl1 | Cs1 <sup>3</sup>  | 89.956(5)  |
| Cl1               | Ag1 | Cs1 <sup>13</sup> | 125.3      | Cs1 <sup>12</sup> | Cl1 | Cs1 <sup>3</sup>  | 89.956(5)  |
| Cl1 <sup>18</sup> | Ag1 | Cs1 <sup>5</sup>  | 125.3      | Cs1 <sup>12</sup> | Cl1 | Cs1 <sup>5</sup>  | 89.956(5)  |
| Cl1 <sup>17</sup> | Ag1 | Cs1 <sup>5</sup>  | 125.3      | Ag1               | Cl1 | Cs1               | 91.59(8)   |
| Cl1               | Ag1 | Cs1 <sup>5</sup>  | 54.7       | Ag1               | Cl1 | Cs1 <sup>5</sup>  | 91.59(8)   |
| Cl1 <sup>7</sup>  | Ag1 | Cs1 <sup>12</sup> | 125.3      | Ag1               | Cl1 | Cs1 <sup>3</sup>  | 91.59(8)   |
| Cl1 <sup>18</sup> | Ag1 | Cs1 <sup>12</sup> | 125.3      | Ag1               | Cl1 | Cs1 <sup>12</sup> | 91.59(8)   |
| Cl1 <sup>10</sup> | Ag1 | Cs1 <sup>5</sup>  | 125.3      | Ag1               | Cl1 | In1               | 180.0      |
| Cl1               | Ag1 | Cs1 <sup>12</sup> | 54.7       | Ag1               | Cl1 | Cr1               | 180.0      |
| Cl1 <sup>10</sup> | Ag1 | Cs1 <sup>13</sup> | 54.7       | In1               | Cl1 | Cs1 <sup>3</sup>  | 88.41(8)   |
| Cl1 <sup>7</sup>  | Ag1 | Cs1 <sup>14</sup> | 125.3      | In1               | Cl1 | Cs1               | 88.41(8)   |
| Cl1 <sup>7</sup>  | Ag1 | Cs1               | 54.7       | In1               | Cl1 | Cs1 <sup>5</sup>  | 88.41(8)   |
| Cl1               | Ag1 | Cs1 <sup>14</sup> | 125.3      | In1               | Cl1 | Cs1 <sup>12</sup> | 88.41(8)   |
| Cl1 <sup>10</sup> | Ag1 | Cs1               | 54.7       | Cr1               | Cl1 | Cs1               | 88.41(8)   |
| Cl1 <sup>7</sup>  | Ag1 | Cs1 <sup>13</sup> | 54.7       | Cl1 <sup>21</sup> | Cr1 | Cl1 <sup>22</sup> | 90.000(1)  |
| Cl1 <sup>10</sup> | Ag1 | Cs1 <sup>15</sup> | 125.3      | Cl1 <sup>23</sup> | Cr1 | Cl1 <sup>4</sup>  | 180.0      |
| Cl1 <sup>18</sup> | Ag1 | Cs1 <sup>13</sup> | 54.7       | Cl1 <sup>23</sup> | Cr1 | Cl1 <sup>21</sup> | 90.000(1)  |
| Cl1 <sup>17</sup> | Ag1 | Cs1               | 125.3      | Cl1               | Cr1 | Cl1 <sup>4</sup>  | 90.000(1)  |
| Cl1 <sup>16</sup> | Ag1 | Cs1 <sup>15</sup> | 54.736(1)  | Cl1               | Cr1 | Cl1 <sup>21</sup> | 180.0      |
| Cl1 <sup>16</sup> | Ag1 | Cs1 <sup>13</sup> | 125.264(1) | Cl1 <sup>21</sup> | Cr1 | Cl1 <sup>4</sup>  | 90.0       |
| Cl1 <sup>17</sup> | Ag1 | Cs1 <sup>15</sup> | 125.3      | Cl1               | Cr1 | Cl1 <sup>22</sup> | 90.000(1)  |
| Cl1 <sup>18</sup> | Ag1 | Cs1               | 125.3      | Cl1 <sup>6</sup>  | Cr1 | Cl1 <sup>4</sup>  | 90.0       |
| Cl1               | Ag1 | Cs1 <sup>15</sup> | 125.3      | Cl1 <sup>23</sup> | Cr1 | Cl1 <sup>22</sup> | 90.000(1)  |
| Cl1 <sup>18</sup> | Ag1 | Cs1 <sup>15</sup> | 54.7       | Cl1 <sup>23</sup> | Cr1 | Cl1 <sup>6</sup>  | 90.0       |
| Cl1 <sup>10</sup> | Ag1 | Cs1 <sup>12</sup> | 125.3      | Cl1 <sup>22</sup> | Cr1 | Cl1 <sup>4</sup>  | 90.0       |
| Cl1               | Ag1 | Cs1               | 54.7       | Cl1 <sup>21</sup> | Cr1 | Cl1 <sup>6</sup>  | 90.0       |
| Cl1 <sup>16</sup> | Ag1 | Cs1               | 125.3      | Cl1               | Cr1 | Cl1 <sup>23</sup> | 90.000(1)  |
| Cl1 <sup>18</sup> | Ag1 | Cs1 <sup>14</sup> | 54.7       | Cl1               | Cr1 | Cl1 <sup>6</sup>  | 90.000(1)  |
| Cl1 <sup>17</sup> | Ag1 | Cs1 <sup>14</sup> | 54.7       | Cl1 <sup>16</sup> | Cr1 | Cl1 <sup>22</sup> | 180.0      |



Table S5 Cr<sup>3+</sup> and Yb<sup>3+</sup> content from starting materials and measured by ICP.

| CAIC:x%Cr <sup>3+</sup>                                        |                                                                   |
|----------------------------------------------------------------|-------------------------------------------------------------------|
| Nominal (atomic ratio %)<br>{[Cr] / ([Cr] + [In])} ×100        | ICP-OES (atomic ratio % of Cr)<br>{[Cr] / ([Cr] + [In])} ×100     |
| 10                                                             | 0.0766                                                            |
| 20                                                             | 0.1592                                                            |
| 30                                                             | 0.2814                                                            |
| 40                                                             | 0.4568                                                            |
| 50                                                             | 0.9586                                                            |
| CAIC:30%Cr <sup>3+</sup> ,y%Yb                                 |                                                                   |
| Nominal (atomic ratio y %)<br>{[Yb] / ([Yb] +[Cr]+ [In])} ×100 | ICP-MS (atomic ratio % of Yb)<br>{[Yb] / ([Yb] +[Cr]+ [In])} ×100 |
| 3                                                              | 0.018                                                             |
